# Supplementary material for: Control and Manipulation of Microwave Polarization and Power of a Frequency-Agile 198 GHz Gyrotron for Magnetic Resonance
Source: Springer Nature journal article supplement (doi:10.1007/s10762-023-00907-4), 2023-02-22
Supplement: MOESM1 [file 24056738]

# Supporting Information: Control and Manipulation of Microwave Polarization and Power of a frequency-agile 198 GHz Gyrotron for Magnetic Resonance

Marthe Millen, Ioannis Gr. Pagonakis, Snædís Björgvinsdóttir, Nicholas Alaniva and Alexander B. Barnes

*Laboratory of Physical Chemistry, ETH Zurich, Vladimir-Prelog-Weg 2, 8093 Zurich, Switzerland*

## Qualitative analysis of the microwave beam profile

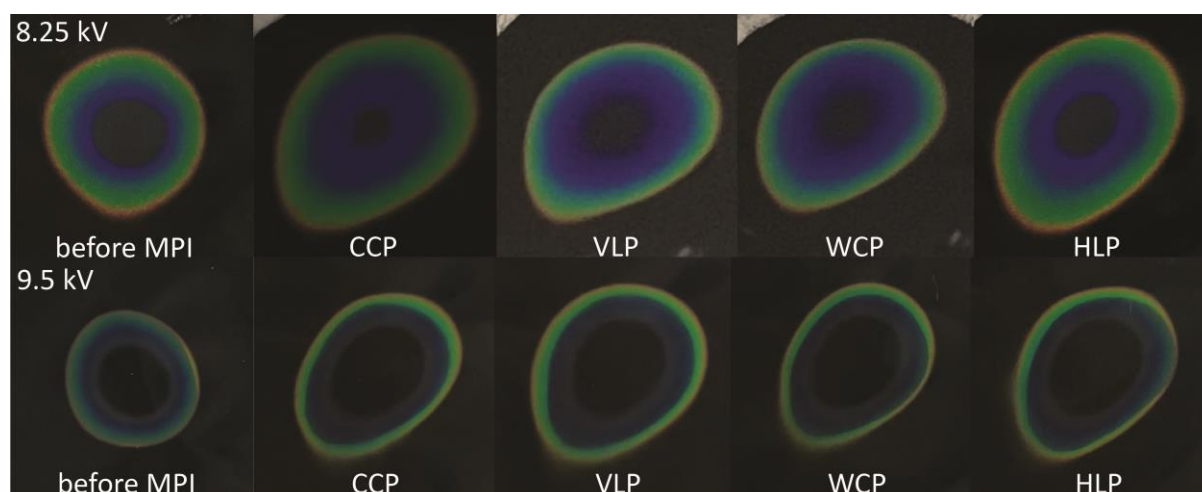

**Figure S1:** Beam profiles measured with temperature sensitive liquid crystal sheets from Edmund Optics. The first row corresponds to the measurements performed at a gyrotron voltage of 8.25 kV while the second row profiles were recorded at a voltage of 9.5 kV. The 1<sup>st</sup> column depicts the beam profiles before the microwaves enter the quasi optical system, while the 2<sup>nd</sup> to 5<sup>th</sup> columns correspond to the different polarizations (CCP: correct handed circular polarization, VLP: vertical linear polarization, WCP: wrong handed circular polarization, HLP: horizontal linear polarization). The microwave beam profiles before the Martin-Puplett interferometer (MPI) fit the Gaussian beam well. For the operating point of 8.25 kV a liquid crystal sheet with a temperature range of 30 °C – 35 °C (red 30 °C – green 31 °C – blue 35 °C) was used while for 9.5 kV the liquid crystal sheet had a temperature range of 40 °C – 45 °C (red 40 °C – green 41 °C – blue 45 °C). The black regions in the middle of the beam profiles indicate that the heating caused by the microwaves is outside the temperature range of the sheets.

## Comparison between theoretically calculated and measured power at the end of the quasi optical system

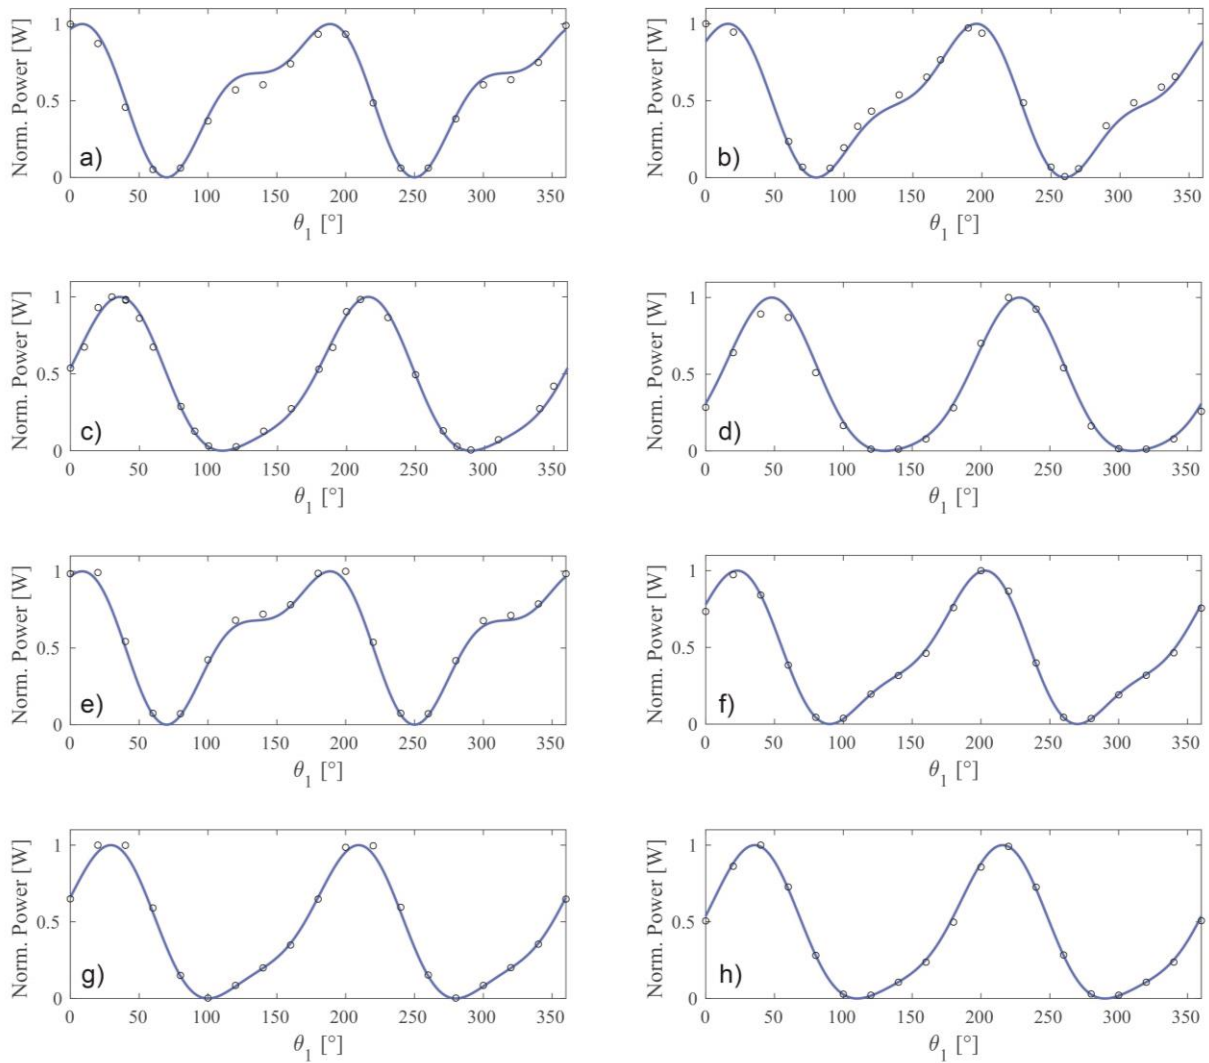

**Figure S2:** Measured power as a function of the angle  $\theta_1$  of RWGP1 for a fixed RWGP2 (a)  $\theta_2 = 70^\circ$ , b)  $\theta_2 = 80^\circ$ , c)  $\theta_2 = 110^\circ$  and d)  $\theta_2 = 130^\circ$ , e)  $\theta_2 = 70^\circ$ , f)  $\theta_2 = 90^\circ$ , g)  $\theta_2 = 100^\circ$ , h)  $\theta_2 = 110^\circ$ ) is displayed with black circles. The blue curves correspond to the theoretically calculated power using the parameters for which the global error is minimum. a)-d) were recorded with the gyrotron being operated at 8.25 kV and e)-h) correspond to the measurements performed at an accelerating voltage of 9.5 kV.
